Rieder et al. – Field-compatible dried qPCR assays

## 1 **Detecting aquatic pathogens with field-compatible dried qPCR assays**

2 Jessica Rieder<sup>a, §</sup>, Pedro M. Martin-Sanchez<sup>b, c, §</sup>, Omneya A. Osman<sup>d</sup>, Irene Adrian-Kalchhauser<sup>a</sup>,  
3 Alexander Eiler<sup>b, d, \*</sup>

4

5 Affiliations:

6 <sup>a</sup> Institute for Fish and Wildlife Health, University of Bern, Länggassstrasse 122, 3012 Bern, Switzerland.

7 [jessica.rieder@vetsuisse.unibe.ch](mailto:jessica.rieder@vetsuisse.unibe.ch); [irene.adrian-kalchhauser@vetsuisse.unibe.ch](mailto:irene.adrian-kalchhauser@vetsuisse.unibe.ch)

8 <sup>b</sup> Section for Aquatic Biology and Toxicology, Department of Biosciences, University of Oslo, P.O. Box

9 1066 Blindern, 0316 Oslo, Norway. [p.m.martin-sanchez@ibv.uio.no](mailto:p.m.martin-sanchez@ibv.uio.no); [alexander.eiler@ibv.uio.no](mailto:alexander.eiler@ibv.uio.no)

10 <sup>c</sup> Instituto de Recursos Naturales y Agrobiología, IRNAS-CSIC, Avenida Reina Mercedes 10, 41012

11 Seville, Spain

12 <sup>d</sup> eDNA Solutions AB, Bjorkasgatan 16, SE-43131 Molndal, Gothenburg, Sweden.

13 [omneya@ednasolutions.se](mailto:omneya@ednasolutions.se)

14

15 <sup>§</sup> These authors contributed equally to this work

16 <sup>\*</sup> Corresponding author: Alexander Eiler at [alexander.eiler@ibv.uio.no](mailto:alexander.eiler@ibv.uio.no)

17

18 Abstract:

19 Field-ready qPCR assays with a long shelf-life support monitoring programs for emerging aquatic  
20 pathogens and enable quick conservation and management decisions. Here, we develop, validate, and  
21 test the shelf-life of qPCR assays targeting *Gyrodactylus salaris* and *Aphanomyces astaci* with  
22 lyophilization and air-drying.

23

24 Keywords: lyophilization, qPCR, air-dried assay, environmental diagnostics, aquatic pathology, eDNA

25 Pathogenic species are a major threat to aquatic and terrestrial ecosystems. Globalization  
26 (international trade, transportation, and urbanization) and anthropogenic global changes have been  
27 fostering the spread of pathogens (McIntyre et al., 2017; Guenard, 2021), resulting in biodiversity  
28 decline and economic losses. Three relevant aquatic pathogens with economic and ecologic  
29 implications are: (i) the monogenean salmon parasite *Gyrodactylus salaris* (*Gs*) that colonizes the skin,  
30 gills, and fins of salmon and has caused widespread losses in both wild and farmed Atlantic salmon  
31 (Bakke et al., 1992; Rusch et al. 2018), (ii) the crayfish pathogen oomycete *Aphanomyces astaci* (*Aa*)  
32 that elicits crayfish plague in native European, Asian, and Australian crayfish species and causes  
33 massive die-off events (Martín-Torrijos et al., 2021), and (iii) the amphibian-targeting panzootic chytrid  
34 fungus *Batrachochytrium dendrobatidis* (*Bd*), which originated in Asia, spread globally because of  
35 amphibian trade, and has decimated more than 500 amphibian species over the past half-century  
36 (Fisher and Garner, 2007, 2020; Scheele et al., 2019).

37 The analysis of environmental DNA (eDNA) is an emerging approach for quick, relatively  
38 inexpensive monitoring and detection of aquatic pathogenic organisms (Amarasiri et al., 2021). As a  
39 result, scientists, governmental agencies, and companies are increasingly incorporating eDNA methods  
40 into (semi)-automatic sampling machines coupled to portable real-time quantitative PCR (qPCR)  
41 thermocyclers for continuous on-site pathogen monitoring of waterways (Thomas et al., 2020;  
42 Sepulveda et al., 2019, 2020). However, a remaining challenge is the requirement of cold storage for  
43 key reagents, which prohibits their use in field-operating machinery. Reagents that can be dried and  
44 are stable at room temperature (RT) from are commercially available. However, they have not been  
45 independently evaluated for their applicability and true shelf-life regarding eDNA monitoring of  
46 pathogens.

47 This study describes field-ready storable dried qPCR assays for three aquatic pathogens, *Gs*, *Aa*,  
48 and *Bd*. The dried *Bd* assay was not evaluated for shelf-life, so results are not shown but worked upon  
49 reconstitution after drying. For *Gs* and *Aa* assays, we compared two different drying methods,  
50 lyophilization and air-drying, and amplification efficiency of dried assays across a time series (Table 1).

51 All three assays targeted the rDNA internal transcribed spacer 1 (ITS1) region and were evaluated  
52 for reproducibility and sensitivity in a wet, freshly-made state. The standard curves were generated  
53 using serial dilutions of synthetic double-strain DNA fragments (gBlocks, Integrated DNA Technologies,  
54 Inc., Belgium) encompassing the target regions of the three assays (Table 1; Fig.1a,c; Supp. Material

55 Fig. S1).

56 After generating baseline data for the wet assays, the efficiency and shelf-life of dried assays for *Gs*  
 57 and *Aa* were evaluated with a 12-week time-series experiment. The *Gs* assays were prepared using  
 58 SensiFAST Lyo-Ready (Meridian Biosciences, Bioline Assays Ltd, UK) with an exogenous internal  
 59 positive control (IPC; Applied Biosystems), which allows for the assessment of both the overall integrity  
 60 of assays and the potential false negatives (PCR inhibition) in future environmental analyses. *Gs* assays  
 61 were frozen at -80°C for 24h and then lyophilized at -50°C and <0.1 mbar for 4h with a FreeZone 2.5  
 62 Liter Benchtop (Labconco, USA). *Aa* assays were prepared with Air-Dryable qPCR Mix (Meridian  
 63 Biosciences, Bioline Assays Ltd, UK) and air-dried at 65°C for 65 min using a drying oven with a fan  
 64 speed of 100%; no IPC was used (Table 1). Both assays were vacuum-sealed in bags with silica beads,  
 65 placed in darkness, and stored at either 4°C or RT (21°C ±1°C). qPCR analyses comparing dried vs.  
 66 fresh assays were conducted every two weeks post-drying. Three different concentrations of the  
 67 gBlocks fragments were used as standards for *Gs* ( $5.8 \times 10^5$ ,  $5.8 \times 10^3$  and 58 copies of *Gs*\_124-289)  
 68 and *Aa* ( $1.9 \times 10^8$ ,  $1.9 \times 10^6$  and  $1.9 \times 10^4$  copies of *Aa*\_1-152) (Fig. 1).

69

| Target <sup>a</sup>                  | Forward primers (conc.)       | Reverse primers (conc.)       | TaqMan probe (conc.)          | IPC <sup>b</sup> | gBlocks fragments of reference sequences (Acc. No) <sup>c</sup> | qPCR program                                         | Drying method  | Shelf-life tested |
|--------------------------------------|-------------------------------|-------------------------------|-------------------------------|------------------|-----------------------------------------------------------------|------------------------------------------------------|----------------|-------------------|
| <i>Gs</i><br>(Rusch et al., 2018)    | Gsal-208F<br>(0.75 µM)        | Gsal-149R<br>(0.75 µM)        | Gsal-188P-MGB2<br>(0.25 µM)   | Yes              | <i>Gs</i> _124-289<br>(DQ898302)                                | 2 min 95°C;<br>45 cycles (10s<br>95°C, 1 min<br>60C) | Lyophilization | Yes               |
| <i>Aa</i><br>(Vrålstad et al., 2009) | AphAstlT<br>S-39F<br>(1.2 µM) | AphAstl<br>TS-97R<br>(1.2 µM) | AphAstlTS-<br>60T<br>(0.3 µM) | No               | <i>Aa</i> _1-152<br>(AM947023)                                  | 2 min 95°C;<br>45 cycles (5s<br>95°C, 20s<br>60°C)   | Air drying     | Yes               |
| <i>Bd</i><br>(Boyle et al., 2004)    | ITS1-3<br>Chytr<br>(0.9 µM)   | 5.8S-<br>Chytr<br>(0.9 µM)    | Chytr-<br>MGB2<br>(0.25 µM)   | Yes              | <i>Bd</i> _26-271<br>(AY598034)                                 | 2 min 95°C;<br>50 cycles (10 s<br>95°C, 1 min)       | Lyophilization | No                |

|  |  |  |  |  |  |      |  |  |
|--|--|--|--|--|--|------|--|--|
|  |  |  |  |  |  | 60C) |  |  |
|--|--|--|--|--|--|------|--|--|

70 **Table 1.** qPCR assays evaluated in this study.

71 <sup>a</sup> Gs: *Gyrodactylus salaris*; Aa: *Aphanomyces astaci*; Bd: *Batrachochytrium dendrobatidis*

72 <sup>b</sup> IPC: Internal Positive Control including a TaqMan probe plus its complementary standard DNA.

73 <sup>c</sup>: gBlocks names refer to the selected positions in the corresponding reference sequences, whose

74 GenBank Accession numbers are detailed

75

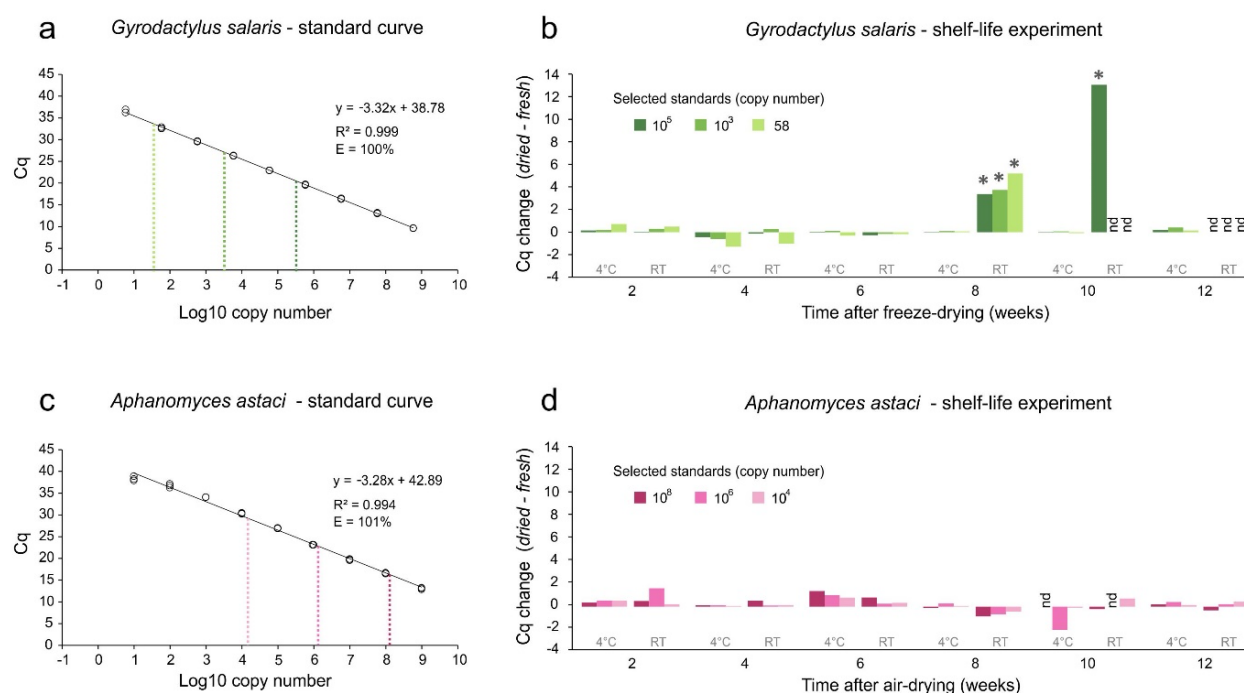

76

77 **Figure 1.** Validation and stability results for the two dried assays. (a + c) Standard curves of TaqMan-

78 based qPCR amplification of *Gyrodactylus salaris* (Gs; a) and *Aphanomyces astaci* (Aa; c) using fresh

79 assays and gBlocks fragments. Standard curves were plotted using all three replicates for each serial

80 dilution. The dotted lines represent the three concentrations used in each shelf-life experiment. (b + d)

81 Shelf-life experiment results for Gs (b) and Aa (d) over 12 weeks, testing three concentrations and two

82 different storage temperatures (4°C and room temperature - RT). These results are shown as changes

83 in Cq values compared to fresh assay (Cq dried – Cq fresh). Concentrations for each assay were

84 selected within the quantification range. Asterisks indicate the main Cq changes associated with the

85 degradation of the assays (see details in Fig. 2).

86

87 We find that in three of four conditions (i.e., Gs: 4°C, Aa: 4°C, RT), dried assays perform equally  
88 well as fresh assays even after 12 weeks (3 months) of storage. Only Gs assays stored at RT declined  
89 in performance at week 8, with increased Cq values and anomalous IPC signals (Fig. 1b, indicated by  
90 the asterisks; Fig. 2). In optimum conditions, the Cq values for IPC (VIC) should be  $25 \pm 2$ , as shown in  
91 Fig. 2b for the assays stored at 4°C and fresh controls. While at week 10, only the highest concentration  
92 could be detected, by week 12, all concentrations were undetectable (Fig. 1b). Since the aim was to  
93 develop Gs assays stable at RT, further optimization is required to make this assay stable at RT for the  
94 same duration. In a diagnostic setting, however, often a combination of storage options is possible,  
95 where assays can be stored for a longer time at 4°C and used or stored at RT for field-based studies  
96 (<6 weeks) when cold storage is not possible. Air-dried Aa assays were stable until the end of the  
97 experiment at all concentrations and in both storage conditions. An anomaly occurred in week 10 when  
98 the highest concentration of the 4°C stored group and the medium concentration of the RT stored group  
99 were not detected. Since results in the following timepoint, in week 12, were on par with the control  
100 group, we assume that this anomaly was human or machine-based.

101

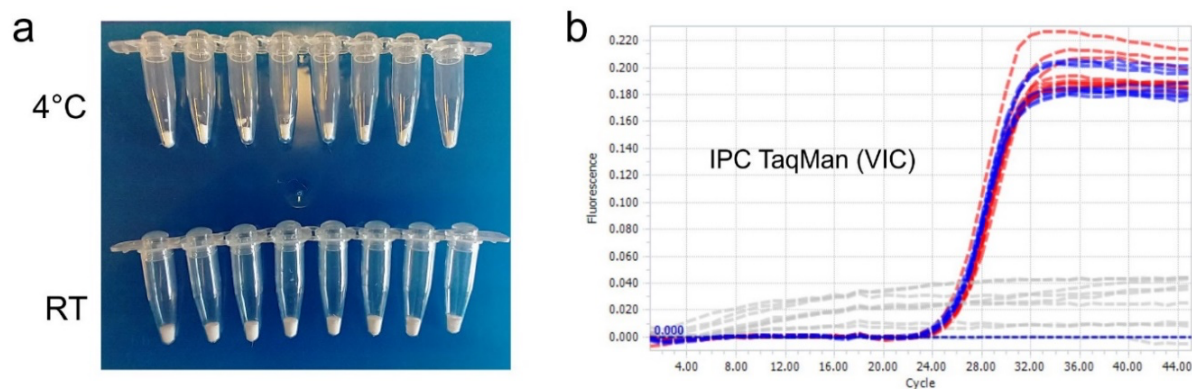

102 *Gyrodactylus salaris* - 8 weeks post-drying

102

103 **Figure 2.** Partial degradation of the freeze-dried *Gyrodactylus salaris* qPCR assays. (a) Aspect of qPCR  
104 reagents. (b) Amplification curves for the internal positive controls (IPC; VIC signals). Note the poor  
105 performance of the dried assays stored at room temperature (grey IPC curves) compared to those  
106 stored at 4°C (red) and fresh controls (blue).

107

108 The development of field-ready diagnostic assays is vital for detecting and controlling emerging

Rieder et al. – Field-compatible dried qPCR assays

109 diseases quickly on site. Here, we provide proof-of-concept data for field-ready qPCR assays that could  
110 be further coupled with portable field-use qPCR machines to detect and monitor aquatic pathogens.  
111 Additional steps include further optimization to increase shelf-life and easy transferability to developing  
112 (semi)-automatic microfluidic devices. A possible method for ease of transferability would be to follow  
113 Xu et al. (2021), where the addition of liquid nitrogen to the master mix formed a transferable ball.

114 We demonstrate the feasibility of preparing dried, long-term stable qPCR reactions that can be  
115 reconstituted with water and a template. All assays would be suitable for short-term field-based  
116 conservation monitoring programs.

117 This work was supported by the Norwegian Environment Agency (Auto e-DNA project).

118

#### 119 **Author statement**

120 Rieder: conceptualization, methodology, validation, writing - original draft, and writing – review & editing

121 Martin-Sanchez: conceptualization, methodology, investigation, writing - original draft, and writing –  
122 review & editing

123 Osman: methodology, writing – review & editing

124 Adrian-Kalchhauser: funding acquisition, supervision, writing – review & editing

125 Eiler: conceptualization, funding acquisition, supervision, writing – review & editing

126

#### 127 **Declaration of competing interest**

128 The authors declare no conflict of interest.

129

#### 130 **References**

131 Amarasiri M, Furukawa T, Nakajima F, Sei K. 2021. Pathogens and Disease Vectors/Hosts Monitoring  
132 in Aquatic Environments: Potential of Using EDNA/ERNA Based Approach. *Science of The Total*  
133 *Environment* 796 (November): 148810. <https://doi.org/10.1016/J.SCITOTENV.2021.148810>.

134 Bakke TA, Harris PD, Jansen PA, Hansen LP. 1992. Host specificity and dispersal strategy in  
135 gyrodactylid monogeneans, with particular reference to *Gyrodactylus salaris* (Platyhelminthes,  
136 Monogenea). *Diseases of Aquatic Organisms* 13: 63–74. [https://www.int-](https://www.int-res.com/articles/dao/13/d013p063.pdf)  
137 [res.com/articles/dao/13/d013p063.pdf](https://www.int-res.com/articles/dao/13/d013p063.pdf)

138 Boyle DG, Boyle DB, Olsen V, Morgan JA, Hyatt AD. 2004. Rapid quantitative detection of

- 139 chytridiomycosis (*Batrachochytrium dendrobatidis*) in amphibian samples using real-time Taqman  
140 PCR assay. *Diseases of Aquatic Organisms* 60(2):141–8.
- 141 Fisher MC, Garner TWJ. 2007. The Relationship between the Emergence of *Batrachochytrium*  
142 *Dendrobatidis*, the International Trade in Amphibians and Introduced Amphibian Species. *Fungal*  
143 *Biology Reviews* 21 (1): 2–9. <https://doi.org/10.1016/J.FBR.2007.02.002>.
- 144 Fisher MC, Garner TWJ. 2020. Chytrid Fungi and Global Amphibian Declines. *Nature Reviews*  
145 *Microbiology* 18(6): 332–43. <https://doi.org/10.1038/s41579-020-0335-x>.
- 146 Guenard R. 2021. Poisson from a Petri Dish. *Inform Magazine* 32, June 2021.  
147 [https://www.aocs.org/stay-informed/inform-magazine/featured-articles/poisson-from-a-petri-dish-](https://www.aocs.org/stay-informed/inform-magazine/featured-articles/poisson-from-a-petri-dish-june-2021?SSO=True)  
148 [june-2021?SSO=True](https://www.aocs.org/stay-informed/inform-magazine/featured-articles/poisson-from-a-petri-dish-june-2021?SSO=True) (accessed 05 July 2022).
- 149 Martín-Torrijos L, Martínez-Ríos M, Casabella-Herrero G, Adams SB, Jackson CR, Diéguez-Urbeondo  
150 J. 2021. Tracing the Origin of the Crayfish Plague Pathogen, *Aphanomyces Astaci*, to the  
151 Southeastern United States. *Scientific Reports* 11(1): 1–11. [https://doi.org/10.1038/s41598-021-](https://doi.org/10.1038/s41598-021-88704-8)  
152 [88704-8](https://doi.org/10.1038/s41598-021-88704-8).
- 153 McIntyre KM, Setzkorn C, Hepworth PJ, Morand S, Morse AP, Baylis M. 2017. Systematic Assessment  
154 of the Climate Sensitivity of Important Human and Domestic Animals Pathogens in Europe.  
155 *Scientific Reports* 7: 7134. <https://doi.org/10.1038/s41598-017-06948-9>.
- 156 Rusch JC, Hansen H, Strand DA, Markussen T, Hytterød S, Vrålstad T. 2018. Catching the fish with  
157 the worm: a case study on eDNA detection of the monogenean parasite *Gyrodactylus salaris* and  
158 two of its hosts, Atlantic salmon (*Salmo salar*) and rainbow trout (*Oncorhynchus mykiss*). *Parasites*  
159 *Vectors* 11: 333. <https://doi.org/10.1186/s13071-018-2916-3>.
- 160 Scheele BC, Pasmans F, Skerratt LF, Berger L, Martel A, Beukema W, Acevedo AA, et al. 2019.  
161 Amphibian Fungal Panzootic Causes Catastrophic and Ongoing Loss of Biodiversity. *Science* 363  
162 (6434): 1459–63. <https://doi.org/10.1126/science.aav0379>.
- 163 Sepulveda AJ, Birch JM, Barnhart EP, Merkes CM, Yamahara KM, Marin III R, Kinsey SM, Wright PR,  
164 Schmidt C. 2020. Robotic Environmental DNA Bio-Surveillance of Freshwater Health. *Scientific*  
165 *Reports* 10(1): 1–8. <https://doi.org/10.1038/s41598-020-71304-3>.
- 166 Sepulveda AJ, Schmidt C, Amberg J, Hutchins P, Stratton C, Mebane C, Laramie MB, Pilliod DS. 2019.  
167 Adding Invasive Species Biosurveillance to the U.S. Geological Survey Streamgage Network.  
168 *Ecosphere* 10 (8): e02843. <https://doi.org/10.1002/ECS2.2843>.



- 169 Thomas AC, Tank S, Nguyen PL, Ponce J, Sinnesael M, Goldberg CS. 2020. A System for Rapid eDNA  
170 Detection of Aquatic Invasive Species.” *Environmental DNA* 2(3): 261–70.  
171 <https://doi.org/10.1002/edn3.25>.
- 172 Vrålstad T, Knutsen AK, Tengs T, Holst-Jensen A. 2009. A quantitative TaqMan MGB real-time  
173 polymerase chain reaction based assay for detection of the causative agent of crayfish plague  
174 *Aphanomyces astaci*. *Veterinary microbiology*, 137(1-2): 146–55.  
175 <https://doi.org/10.1016/j.vetmic.2008.12.022>.
- 176 Xu J, Wang J, Su X, Qiu G, Zhong Q, Li T, Zhang D, Zhang S, He S, Ge S, Zhang J, Xia N. 2021.  
177 Transferable, easy-to-use and room-temperature-storable PCR mixes for microfluidic molecular  
178 diagnostics. *Talanta* 235(December): 122797. <https://doi.org/10.1016/j.talanta.2021.122797>.
